1           **Genome sequencing of the vermicompost strain *Stenotrophomonas***  
2           ***maltophilia* UENF-4GII and population structure analysis of the *S.***  
3           ***maltophilia* Sm3 genogroup**

4           Francisnei Pedrosa-Silva<sup>a</sup>, Filipe P. Matteoli<sup>a</sup>, Hemanuel Passarelli-Araujo<sup>a,b</sup>, Fabio L.  
5           Olivares<sup>c, d</sup>, Thiago M. Venancio<sup>a, \*</sup>

6           <sup>a</sup> Laboratório de Química e Função de Proteínas e Peptídeos, Centro de Biociências e Biotecnologia,  
7           Universidade Estadual do Norte Fluminense Darcy Ribeiro (UENF), Brazil; <sup>b</sup> Departamento de Bioquímica  
8           e Imunologia, Instituto de Ciências Biológicas, Universidade Federal de Minas Gerais, Belo Horizonte, MG,  
9           Brazil; <sup>c</sup> Núcleo de Desenvolvimento de Insumos Biológicos para a Agricultura (NUDIBA), UENF, Brazil; <sup>d</sup>  
10          Laboratório de Biologia Celular e Tecidual, Centro de Biociências e Biotecnologia, UENF, Brazil.

11  
12          \* **Corresponding author:**

13          Thiago M. Venancio; Laboratório de Química e Função de Proteínas e Peptídeos, Centro  
14          de Biociências e Biotecnologia, Universidade Estadual do Norte Fluminense Darcy  
15          Ribeiro (UENF); Av. Alberto Lamego 2000, P5 / sala 217; Campos dos Goytacazes, Rio de  
16          Janeiro, Brazil. E-mail: [thiago.venancio@gmail.com](mailto:thiago.venancio@gmail.com).

17  
18          **ABSTRACT**

19          The *Stenotrophomonas maltophilia* complex (Smc) is a cosmopolitan bacterial group  
20          that has been proposed an emergent multidrug-resistant pathogen. Taxonomic studies  
21          support the genomic heterogeneity of Smc, which comprises genogroups exhibiting a  
22          range of phenotypically distinct strains from different sources. Here, we report the  
23          genome sequencing and in-depth analysis of *S. maltophilia* UENF-4GII, isolated from  
24          vermicompost. This genome harbors a unique region encoding a penicillin-binding  
25          protein (*pbpX*) that was carried by a transposon, as well as horizontally-transferred  
26          genomic islands involved in anti-phage defense via DNA modification, and pili  
27          glycosylation. We also analyzed all available Smc genomes to investigate genes  
28          associated with resistance and virulence, niche occupation, and population structure. *S.*  
29          *maltophilia* UENF-4GII belongs to genogroup 3 (Sm3), which comprises three  
30          phylogenetic clusters (PC). Pan-GWAS analysis uncovered 471 environment-associated  
31          and 791 PC-associated genes, including antimicrobial resistance (e.g. *blaL1* and *blaR1*)  
32          and virulence determinants (e.g. *treS* and *katG*) that provide insights on the resistance  
33          and virulence potential of Sm3 strains. Together, the results presented here provide the  
34          grounds for more detailed clinical and ecological investigations of *S. maltophilia*.

35

36

## 37 INTRODUCTION

38 Vermicomposting is a non-thermophilic biodegradation technique used to manage  
39 organic waste [1]. The process involves synergistic interactions between earthworms  
40 and microorganisms to biodegrade different organic waste into a humus-like material  
41 known as vermicompost, a nutrient-rich organic amendment used to enhance soil  
42 microbial diversity and plant development [2, 3]. Vermicomposts harbor soil bacteria  
43 from various genera, such as *Bacillus*, *Pseudomonas*, *Serratia*, and *Stenotrophomonas*,  
44 which may engage in beneficial interactions with plants [4, 5].

45 *Stenotrophomonas maltophilia* is a Gram-negative bacillus found in a wide range  
46 of natural habitats, including water sources, soils, rhizospheres, animal microbiotas,  
47 including humans [6, 7]. *S. maltophilia* has also been used as part of bioremediation and  
48 biocontrol strategies [6, 8]. However, *S. maltophilia* has been reported as a global  
49 multidrug resistant opportunistic pathogen associated with significant mortality rates of  
50 up to 37.5%, mainly because of bacteremia and respiratory tract infections in severely  
51 debilitated, immunosuppressed or chronic lung disease patients [9, 10]. *S. maltophilia* is  
52 intrinsically resistant to multiple classes of antibiotics, such as aminoglycosides,  
53 carbapenems, and macrolides, posing a therapeutic challenge and delay the  
54 administration of proper antibiotics [7].

55 *S. maltophilia* present high intraspecific variability [11] and, along with the  
56 closely related species *S. pavanii*, comprise the *S. maltophilia* complex (Smc) [12-14].  
57 Phylogenic studies based on multilocus sequencing typing (MLST) and whole-genome  
58 sequencing revealed the organization of Smc members in several genogroups [15-17]. A  
59 study using whole-genome multilocus sequence typing (wgMLST) and average  
60 nucleotide identity (ANI) analyses showed the genetic organization of Smc in 23  
61 monophyletic genogroups with different virulence and resistance characteristics [18].  
62 Among those, genogroup 3 (Sm3) exhibits a myriad of phenotypically distinct strains  
63 from different sources. These strains remain poorly explored, hampering investigations  
64 on the genetic determinants underlying the physiology and niche occupation of *S.*  
65 *maltophilia* isolates.

66 Here we present the genome sequencing of *S. maltophilia* UENF-4GII, the first *S.*  
67 *maltophilia* isolated from vermicompost. *S. maltophilia* UENF-4GII belongs to Sm3 and  
68 harbors a set of interesting horizontally-transferred regions, including genomic islands  
69 (GIs) involved in phage resistance via DNA modification, and pili glycosylation. ANI  
70 analysis and SNP-based phylogenetic reconstructions allowed us to reclassify six publicly  
71 available *Stenotrophomonas* spp. genomes as *S. maltophilia* from Sm3. We also used the  
72 *S. maltophilia* UENF-4GII genome with those of other 66 *S. maltophilia* isolates to  
73 thoroughly characterize of the population structure, virulence, and resistance profiles  
74 of Sm3. Finally, a pangenome-wide association study (pan-GWAS) of Sm3 allowed us to  
75 identify genes associated with niche occupation and phylogenetic clusters.

76

## 77 **METHODS**

### 78 **Bacterial isolation and identification**

79 The bacterium was isolated from mature manure vermicompost produced from cattle  
80 manure at Universidade Estadual do Norte Fluminense Darcy Ribeiro, Brazil. In  
81 summary, serial dilutions ( $10^{-1}$  to  $10^{-7}$ ) were performed on a solution prepared by  
82 adding 10 g of vermicompost in 90 mL of saline ( $8.5 \text{ g}\cdot\text{L}^{-1}$  NaCl), followed by shaking for  
83 60 min. Then, 100  $\mu\text{L}$  of the final dilution ( $10^{-7}$ ) were taken and spread on plates  
84 containing solid Nutrient Broth (NB) with  $8 \text{ g}\cdot\text{L}^{-1}$  of NB and  $15 \text{ g}\cdot\text{L}^{-1}$  of agar in 1 L of  
85 distilled water. After incubation at 30 °C for 7 days, different colony types could be  
86 identified and, for purification, individual colonies were transferred to Petri plates with  
87 Dygs solid media acquired from Vetec (São Paulo, Brazil). After isolation and purification  
88 on Dygs solid medium, a yellowish, circular, convex elevation, punctiform and smooth  
89 surface bacterial colony was selected. Light microscopy revealed a Gram-negative strain  
90 and the presence of rod-shaped motile was confirmed under phase contrast microscopy.  
91 This isolate, named UENF-4GII, was stored in a 16 mL glass flask containing 5 mL of  
92 Nutrient Broth solid medium covered with mineral oil and later grown in liquid Dygs  
93 medium under rotatory shaker at 150 rpm and 30 °C for 36 h.

94

### 95 **Genome sequencing and annotation**

96 Genomic DNA was extracted using QIAamp<sup>®</sup> DNA Mini Kit (Qiagen) and quantified with  
97 an Agilent Bioanalyzer 2100 instrument (Agilent, California, USA). Paired-end libraries  
98 were previously prepared with the TruSeq Nano DNA LT Library Prep (Illumina) and  
99 sequenced on an Illumina HiSeq 2500 sequencing system at the Life Sciences Core  
100 Facility (LaCTAD; UNICAMP, Campinas, Brazil). Sequencing reads (2 x 100 bp) were  
101 assembled *de novo* with SPAdes v.10.3.1 [19] and scaffolded with Gfinisher v.1.4 [20],  
102 using as references the complete genome of *S. maltophilia* JV3 (GCF\_000223885.1) and  
103 an alternative assembly generated with Velvet 1.2.10 [21]. The assembly statistics were  
104 assessed with QUAST v.3.0 [22]. Genome completeness was assessed with BUSCO v.4.0  
105 [23], using the *Gammaproteobacteria* dataset as reference. PlasmidSpades [24] was  
106 used to predict plasmids. The assembled genome was annotated with the NCBI  
107 Prokaryotic Genome Annotation Pipeline (PGAP) [25]. The UENF-4GII genome was  
108 deposited into DDBJ/EMBL/GenBank under the accession number JABUNQ000000000.  
109 Genes involved in antimicrobial metabolite biosynthesis were predicted using  
110 antiSMASH [26]. Insertion sequences (ISs) and GIs were predicted with ISEscan v.1.5.4  
111 [27] and Islandviewer4 [28], respectively. Bacteriophage signatures were analyzed with  
112 PHASTER [29].

113

## 114 **Genome similarity assessment**

115 We downloaded 641 genomes of *Stenotrophomonas* available in the RefSeq database in  
116 January, 2021 [30, 31]. Genome completeness was assessed with BUSCO 4.0 [23], using  
117 quality score  $\geq 90\%$  and the *Gammaproteobacteria* dataset as reference. We excluded  
118 assemblies with more than 500 contigs. A preliminary genome distance estimation  
119 analysis of isolate UENF-4GII and RefSeq genomes was performed using Mash [32] and  
120 a distance tree was generated using MASHtree v.0.50 [33]. All-against-all ANI based on  
121 MUMmer alignment (ANIm) was performed with pyani v.0.27 [34]. To assess the  
122 concordance between ANI and Mash estimates, we performed a linear correlation  
123 analysis using Pearson's correlation coefficient. For this analysis, the Mash distances  
124 were converted into Mash scores (1-Mash distance) to allow a direct comparison with  
125 ANI values.

126

## 127 **Pangenome analysis**

128 The Sm3 genogroup pangenome was performed with Roary v.3.6, using 95% identity  
129 threshold to determine orthologous [35]. Core genes were aligned with MAFFT v.7.394  
130 [36]. SNPs were extracted from the core-genome alignment using SNP-sites v.2.3.3 [37]  
131 and maximum likelihood phylogenetic reconstructions were performed with IQ-tree  
132 [38], with ascertainment bias correction under the model GTR+ASC. The bootstrap  
133 support was evaluated using the ultrafast bootstrap method with 1000 replicates [39].  
134 The resulting phylogenetic tree was visualized with iTOL v4 [40].

135 As a complementary approach, we performed a pangenome-wide association  
136 study (pan-GWAS) on the on the Sm3 dataset using Scoary [92]. The pan-GWAS was  
137 computed using the Roary output to find genes associated with isolation source (clinical  
138 or non-clinical) and to establish which genes were typical of each phylogenetic cluster  
139 (PC), while correcting for population structure using the core-genome phylogenetic tree  
140 (command `-n tree`). False-discovery rate was estimated by Benjamini–Hochberg  
141 adjusted p-value provided in Scoary. We only reported the results with specificity  $> 70\%$   
142 and Benjamini–Hochberg corrected p-value  $< 0.05$ . The binary heatmaps of trait-  
143 associated genes were rendered using R package tidyverse [41].

144

## 145 **Virulome and resistome analysis**

146 Virulence and antimicrobial resistance genes were predicted using Usearch v.11.0.667  
147 screened against the Virulence Factors of Pathogenic Bacteria Database (VFDB) and the  
148 Comprehensive Antibiotic Resistance Database (CARD). Minimum identity and coverage  
149 thresholds of 60% and 50% were used in these searches, respectively. The

150 presence/absence profiles of virulence and resistance-associated genes were rendered  
151 using R package tidyverse [41].

152

## 153 **RESULTS**

### 154 **Genome analysis of *S. maltophilia* UENF-4GII**

155 During the characterization of culturable bacteria from mature cattle vermicompost, we  
156 identified a bacterium that was preliminarily characterized as *Stenotrophomonas* sp.  
157 using 16S rRNA sequencing. We submitted the genome of this isolate to whole-genome  
158 sequencing (see methods for details). The 30,093,445 paired-end reads and were  
159 assembled into 3 scaffolds, with an  $N_{50}$  of 1.3 Mbp, encompassing a total of 4.4 Mbp  
160 with 66.55% GC content. No plasmids were detected. BUSCO assessment recovered 437  
161 (96.68%) single copy genes of *Gammaprotebacteria* dataset, supporting the  
162 completeness and high quality of the assembled genome. The genome harbors 3,932  
163 protein-coding genes, 70 tRNA genes, and 2 rRNA operons.

164 The *S. maltophilia* UENF-4GII genome carries 18 complete IS elements: nine of  
165 the IS481 family, seven of the IS3 family and a single copy of the IS5 and IS21 families  
166 (Supplementary figure S1). In addition, we also found an incomplete prophage region  
167 that is closely related with a temperate bacteriophage from *Burkholderia pseudomallei*  
168 (Burkho\_phi1026b) [42]. AntiSMASH prediction revealed that UENF-4GII possesses four  
169 gene clusters involved in the production of two bacteriocin-like compounds, an aryl  
170 polyene related to Xanthomonadin [43], and a non-ribosomal peptide synthetase (NRPS)  
171 gene cluster involved in the biosynthesis of siderophore (Supplementary figure S1).  
172 Siderophores are the most important iron uptake systems in *S. maltophilia* [44]. In NRPS  
173 gene cluster, we identified six genes (HRE58\_11480 to 11500, and HRE58\_11505)  
174 encoding an specific siderophore of *S. maltophilia* [45]. These enzymes are similar to  
175 those involved in enterobactin biosynthesis in enteric bacteria (e.g. *E. coli*) [44].

176

### 177 **Genome similarity of UENF-4GII**

178 In order to investigate the genomic relatedness of UENF-4GII strain, we downloaded all  
179 available *Stenotrophomonas* genomes in Refseq database (n=641, January 2021), out of  
180 which 627 were retained after BUSCO quality filtering (see method for details). Genome  
181 identity was computed using Mash and ANI. The mash-distance phylogeny highlights the  
182 diversity of the *Stenotrophomonas* genus, corroborating the *S. maltophilia* complex  
183 organization in different genogroups (Figure 1A), as previously described by Gröschel et  
184 al. [18]. We identified 17 genogroups according to the distance estimation of well-  
185 characterized representative genomes, including the affiliation of UENF-4GII to Sm3,  
186 along with other 67 clinical and non-clinical strains (Supplementary table S1). In

187 addition, this analysis allowed us to reclassify six *Stenotrophomonas* spp. as *S.*  
188 *maltophilia* Sm3 isolates, including the environmental strains *Stenotrophomonas* sp.  
189 DDT-1 (GCF\_001580555.1) and *Stenotrophomonas* sp. Pemsol (GCF\_003586545.1),  
190 reported as specific biodegraders of organochlorine pesticide (DDT) and polycyclic  
191 aromatic hydrocarbons (PAH), respectively. Mash results are supported by ANI analysis,  
192 which showed genomic identity above 95% within the same genogroup (Figure 1B).  
193 Moreover, the strong positive linear correlation ( $r = 0.98$ ,  $p\text{-value} < 2.2e-16$ ) between  
194 ANI and Mash results (Figure 1C) confirm a similar level of resolution for species  
195 delineation within the *Stenotrophomonas* genus.

196

### 197 **Pangenome analysis**

198 The pangenome analysis of the 67 Sm3 isolates comprises 13,380 genes, with 2,754 core  
199 genes (i.e. present in at least 95% of the strains), 1,958 shell genes (present in 15% to  
200 95% of the strains), and 8,668 cloud genes (present in up to 15% of the strains). The  
201 heap law estimate supports an open pangenome ( $\alpha = 0.65$ ) (Figure 2A), which  
202 typically reflects a high genetic diversity through the acquisition of exogenous DNA [46].  
203 The genomic fluidity ( $\phi$ ) Sm3 was estimated in 0.18 ( $\pm 0.05$ ), indicating that an average  
204 of 18% of unique gene families between in a given pair of genomes.

205 We also performed a maximum-likelihood phylogenetic reconstruction using  
206 SNPs extracted from core genes (i.e. core-genome multilocus sequencing typing,  
207 cgMLST). This analysis revealed that Sm3 comprises three distinct and highly supported  
208 phylogenetic clusters (PC) (Figure 2B). PC1 ( $n = 21$ ) and PC2 ( $n = 15$ ) encompass clinical  
209 and non-clinical strains, while PC3 ( $n = 31$ ) has only clinical strains. Interestingly, 10 of  
210 the 21 PC1 strains are non-clinical, including *S. maltophilia* UENF-4GII.

211 We identified 75 unique genes in *S. maltophilia* UENF-4GII (Supplementary table  
212 S2), including *pbpX* (HRE58\_12720), which encodes a low molecular weight penicillin-  
213 binding protein (LMW-PBP). This gene is closely located to other unique genes: a gene  
214 with unknown function (HRE58\_12725) and two transposase genes (HRE58\_12730,  
215 HRE58\_12735), flanked by a perfect 26-bp inverted repeat (IR) sequence, supporting  
216 their acquisition by horizontal gene transfer (Supplementary figure 2). LMW-PBPs are  
217 important enzymes involved in cell-wall recycling and considered the major molecular  
218 targets for  $\beta$ -lactam antibiotics [47]. Alterations in the structure of LMW-PBPs are  
219 associated with reduced susceptibility to penicillin and other  $\beta$ -lactams and can induce  
220 the expression of  $\beta$ -lactamases [47-49]. The presence of an LMW-PBP composite  
221 transposon likely confers a competitive advantage for *S. maltophilia* UENF-4GII to thrive  
222 in microbial communities containing penicillin.

223

### 224 **UENF-4GII genomic islands**

225 To further understand genome plasticity, we identified and analyzed 17 putative GIs  
226 (GI1-17) in *S. maltophilia* UENF-4GII, which probably represent recent horizontal gene  
227 transfers (Supplementary table S3). In addition, we compared these GIs with other Sm3  
228 genomes (Figure 3). Among these regions, GI3 harbors an operon (HRE58\_02625-02660)  
229 containing genes encoding GalE, HldD, and glycosyltransferases involved in  
230 lipopolysaccharide biosynthesis. This operon is present in 68% of the PC3 genomes. GI16  
231 contains a class C beta-lactamase and GI10 have blue-light sensor genes that are absent  
232 in PC3 genomes.

233 Interestingly, 60% of the *S. maltophilia* UENF-4GII unique genes are located  
234 within 7 GIs related with DNA metabolism (GI6 and GI17), virulence (GI7 and GI15) and  
235 unknown functions (GI2, GI9 and GI14). GI6 has 9 unique genes, including a restriction-  
236 modification (R-M) system with two type I restriction endonucleases (HRE58\_05925 and  
237 HRE58\_05935) and a DNA methyltransferase (HRE58\_05920). R-M systems defend the  
238 bacterial genomes against bacteriophages and other types of exogenous genetic  
239 elements [50] and, hence, their acquisition might be adaptive by boosting resistance  
240 against phages [51, 52]. The GI17 has 41,433 bp and comprises 14 unique genes,  
241 including a DNA polymerase-like protein (HRE58\_18840) and an operon containing an  
242 8-oxoguanine DNA glycosylase (HRE58\_18870), a nitroreductase (HRE58\_18875), a 7-  
243 cyano-7-deazaguanine synthase (HRE58\_18880; PreQ(0)), and a nucleoside 2-  
244 deoxyribosyltransferase (HRE58\_18885). These genes are likely part of a repair system  
245 for oxidative stress-mediated DNA damage [53]. PreQ(0) might be involved in the  
246 insertion of 7-deazaguanine derivatives in the DNA [54], as part of a defense system  
247 against foreign DNA and phages [55].

248 Finally, 9 of 10 genes from GI15 are unique (Supplementary table S3). This island  
249 is involved in the biosynthesis and glycosylation of type IV pilin-like proteins. Hence, this  
250 island is likely an important virulence factor that mediate bacterial adherence to biotic  
251 and abiotic surfaces. Although pilin glycosylation has been associated with immune  
252 evasion of pathogenic bacteria [56], a recent study showed its role in the defense against  
253 phage infection [57]. Collectively, these GIs indicate that *S. maltophilia* UENF-4GII is  
254 equipped with different horizontally-acquired genes that increased its tolerance to  
255 foreign DNA.

256

### 257 **Pan-GWAS of Sm3 genogroup**

258 We performed a pan-GWAS to identify genes associated with environment type (clinical  
259 and non-clinical; Supplementary table S1) and PCs in Sm3 using Scoary. We found 299  
260 and 172 gene clusters associated with clinical and non-clinical environments,  
261 respectively (Supplementary figure S3, Supplementary table S4). Interestingly, 58% of  
262 the 471 environment-associated genes encode hypothetical proteins with unknown  
263 function.

264           Among the genes associated with clinical environments, we identified genes  
265 encoding a chemotaxis response regulator protein (*cheB*), blue-light sensing protein  
266 (*bluF*), and trehalose sintase *treS*, a crucial enzyme involved in trehalose biosynthesis.  
267 Several bacteria use trehalose as carbon source and stress protectant [58]. Trehalose  
268 metabolism has also been associated with the emergence of virulent human pathogens  
269 [59, 60]. Interestingly, *treS* was also reported as a significant gene associated with  
270 clinical strains of the *S. maltophilia* complex [61]. Moreover, we identified significant  
271 associations with genes involved in bacterial resistance, including multidrug efflux  
272 pumps (*mdtA* and *mdtC*), macrolide efflux (*macA*), aminoglycoside-modifying enzyme  
273 (*aac*),  $\beta$ -lactamases (*blaL1* and *blaL2*), and a  $\beta$ -lactam sensor gene (*blaR1*). *BlaL1* and  
274 *BlaL2* are well known metallo- $\beta$ -lactamases in *Stenotrophomonas*. They hydrolyze  
275 almost all  $\beta$ -lactams, are resistant to all clinically available  $\beta$ -lactamase inhibitors [62,  
276 63] and have been show to increase pathogenicity in clinical settings [63, 64]. Among  
277 the genes associated with non-clinical environments, we also found genes involved in  
278 bacterial resistance, particularly in macrolide efflux (*macA* and *macB*), as well as three  
279 gene clusters involved in heavy metal resistance including copper (*copB*),  
280 cobalt/zinc/cadmium (*czcB*), and mercury (*merR1*).

281           As most non-clinical strains belong to PC1 and PC3 comprised only clinical strains,  
282 most of the environment-related genes are also linked with their respective  
283 phylogenetic groups. A total of 252, 97 and 442 gene clusters were associated,  
284 respectively, with PC1, PC2 and PC3 (Figure 4, Supplementary table S5). The majority  
285 (60%) of the PC-associated genes encoded proteins with unknown functions. PC1 was  
286 strongly associated (100% of sensitivity and specificity) with 13 gene clusters, including a  
287 type II toxin-antitoxin gene (*pasI*) and c-AMP phosphodiesterase encoding gene (*cpdA*)  
288 involved in stress resistance [65, 66]. Further, 11 gene clusters were strongly associated  
289 to PC2, including *besA*, involved in iron metabolism [67], and *katG*, related with oxidative  
290 stress resistance [68]. The PC3 presented 107 associated gene clusters, with 100%  
291 sensitivity and specificity. Among these, we identified genes involved in transcriptional  
292 regulation (*cueR*, *comR*, *rstA*, and *cysL*), iron metabolism (*besA*), antibiotic efflux (*mdtA*  
293 and *mdtC*), and  $\beta$ -lactam resistance (*blaL1*).

294           The variants found in different traits (e.g. *besA*, *macA* and *blaL1*) are directly  
295 associated with genomic diversity of the PCs. A closer look into the *blaL1* variant of PC3  
296 reveals a molecular heterogeneity with 86% mean similarity with *blaL1* from PC1 and  
297 PC2 genomes. Although the functional implications of such diversity is not fully  
298 understood, variation in *blaL1* have been associated with  $\beta$ -lactam resistance in *S.*  
299 *maltophilia*, which may contribute to its increased prevalence as a nosocomial pathogen  
300 [63, 64, 69].

301

302   **Virulome and resistome analysis of the Sm3 genogroup**



303 In order to understand the pathogenic potential within the Sm3 genogroup, we  
304 systematically investigated the distribution of virulence and antimicrobial resistance  
305 genes. The Sm3 virulome contains 54 genes (Supplementary table S6), out of which 35  
306 constitute the core virulome. Most (21 out of 35) of the core virulence genes are  
307 involved in motility and adherence, including *pilMNOPQ* and the *piITU* operon, which  
308 encode type IV pili subunits [70], and *tuf* (elongation factor Tu), involved in adhesion to  
309 host cells and extracellular matrix components [71]. In addition, we also identified seven  
310 type II secretion system (T2SS) genes (e.g. *xpsEFG* and *hxcRS*), which promote the export  
311 of enzymes during bacterial colonization. Further, the presence of T2SS genes along with  
312 other core virulence genes (e.g. *acpXI*, *hemB*, *hemL*, *csrA*, and *icl*), can be involved in  
313 infection and immune evasion capacity of Sm3 strains.

314 The Sm3 accessory virulome comprises 12 low and 7 high frequency genes,  
315 respectively (Figure 5). The high frequency genes are associated with adherence (*pinN*),  
316 motility (*flmH*), iron uptake (*bauA*), immune evasion (*rmIB*), and stress tolerance (*clpB*,  
317 *kata*, and *katG*). The *clpB* gene encodes a heat shock-inducible chaperone required for  
318 bacterial tolerance to a variety of stresses, including heat, osmotic and acidic stress [72].  
319 The *kata* gene encodes a catalase that might confer tolerance against hydrogen  
320 peroxide-based disinfectants [18, 73] and is absent in all PC2 strains. Nevertheless, PC2  
321 has an alternative catalase-peroxidase gene (*katG*) that is absent in PC1 and PC3. The  
322 *katG* gene is associated with oxidative stress control and has different roles in  
323 pathogenic bacteria [68, 74]. Four catalases (KatA1, KatA2, KatMn, and KatE) have been  
324 described in *S. maltophilia*, out of which KatA has been considered the main factor in  
325 conferring tolerance against hydrogen peroxide [75]. The apparent displacement of *kata*  
326 by *katG* in PC2 warrants further investigation and might provide insights the response  
327 of *S. maltophilia* to oxidative stress.

328 The resistome analysis revealed 23 antimicrobial resistance genes  
329 (Supplementary table S7), out of which 17 comprise the core resistome, including the  
330 metallo- $\beta$ -lactamase BlaL1 and the inducible Ambler class A  $\beta$ -lactamase BlaL2, as  
331 described above [76]. Further, antibiotic efflux pumps (e.g. SmeABC, SmeDEF, SmeRS,  
332 OqxAB, GolS, EmrE, and MexK) represent the main resistance mechanism encoded by  
333 the Sm3 core resistome.

334 The accessory resistome encompasses six genes (Figure 5). No accessory genes  
335 were found in PC2, as well as in most PC1 strains, including *S. maltophilia* UENF-4GII.  
336 The accessory resistome contains two classes of aminoglycoside-modifying enzymes:  
337 aminoglycoside phosphotransferase (encoded by *aph(6)-Id* and *aph(3'')Ib*); and N-  
338 aminoglycoside acetyltransferase (encoded by *aac(6')-Iz* and *aac(6')-Iak*). The *aac(6')-Iz*  
339 gene was exclusively found in 25 (81%) PC3 genomes, whereas *aac(6')-Iak* and *aph* genes  
340 were found in four PC1 genomes. Only two strains (G4S2 and G4S2-1) have the  
341 sulfonamide resistance gene *sul2* and the chloramphenicol resistance gene *floR*. In  
342 summary, the Sm3 genomes do not present a large repertoire of acquired resistance

343 genes. The low frequency of sulfonamide resistance genes suggests that this antibiotic  
344 class might be a good therapeutic strategy against *S. maltophilia* infections, as previously  
345 proposed [18].

346

## 347 **CONCLUSION**

348 In this study, we report the sequencing and in-depth analysis of the *S. maltophilia* UENF-  
349 4GII genome. This genome harbors a range of exclusive GIs associated with DNA-  
350 modification and anti-phage defense systems. Comparative analysis using pairwise  
351 genome identity metrics and cgMLST phylogeny show that *S. maltophilia* UENF-4GII  
352 belong to the Sm3 genogroup, which comprises three PCs. Using a pan-GWAS approach,  
353 we identified 131 genes as significantly associated with specific Sm3 PCs. Further, 471  
354 genes were specifically associated with clinical and non-clinical environments. These  
355 genes could be used as biomarkers in future studies. Sm3 genomes comprise a low  
356 number of acquired virulence and resistance genes, although the presence of *katG* and  
357 aminoglycoside resistance genes were associated with specific PCs. Collectively, our  
358 results provide important information regarding *S. maltophilia* genomic diversity that  
359 could provide the grounds for more detailed clinical and ecological investigations.

360

## 361 **ACKNOWLEDGEMENTS**

362

363 This work was supported by Fundação Carlos Chagas Filho de Amparo à Pesquisa do  
364 Estado do Rio de Janeiro (FAPERJ; grants E-26/203.309/2016 and E-26/203.014/2018),  
365 Coordenação de Aperfeiçoamento de Pessoal de Nível Superior - Brasil (CAPES; Finance  
366 Code 001), and Conselho Nacional de Desenvolvimento Científico e Tecnológico. The  
367 funding agencies had no role in the design of the study and collection, analysis, and  
368 interpretation of data and in writing.

369

## 370 **AUTHOR CONTRIBUTIONS**

371

372 Conceived the study: FP-S, TMV, FLO; Funding and resources: TMV, FLO; Data analysis:  
373 FP-S, HP-A; Interpretation of the results: FP-S, FPM, HP-A, TMV; Wrote the manuscript:  
374 FP-S, FPM, HP-A, TMV.

375

376

377

378

379

380

381

382

383 **FIGURES**

384

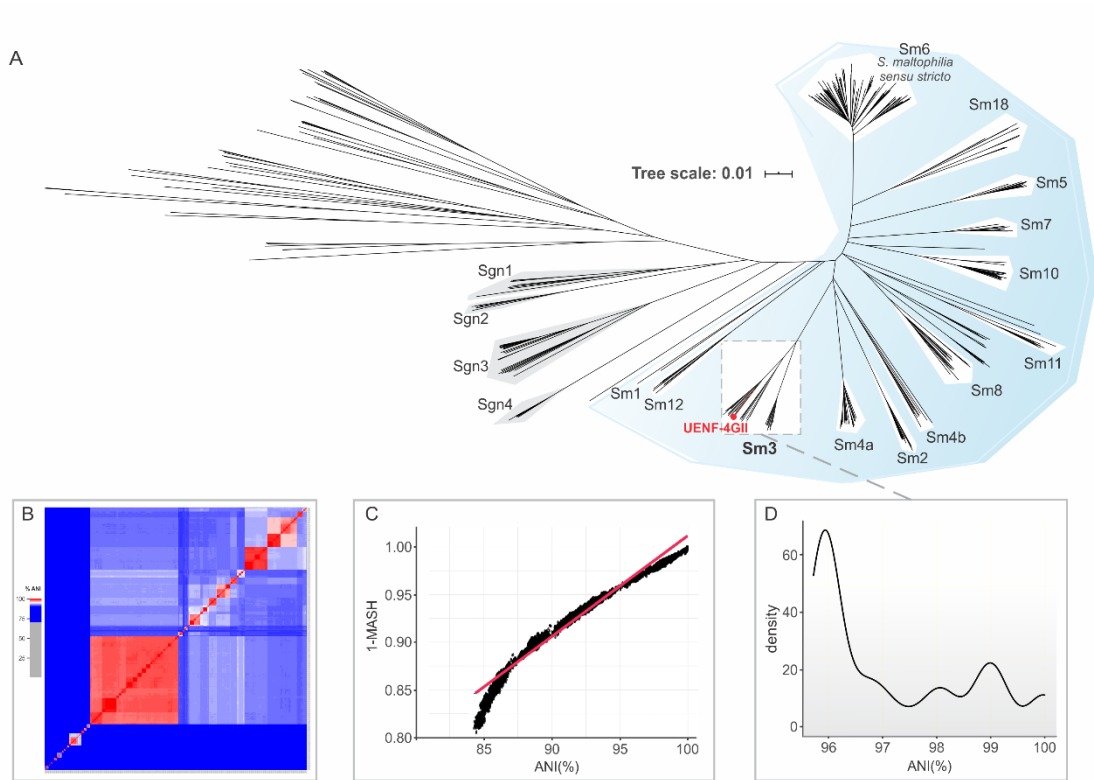

385

386 **Figure 1. Genomic diversity of *Stenotrophomonas* genus.** (A) Mash-distance-based  
387 phylogeny of *Stenotrophomonas*, built using 627 publicly genomes and that of UENF-  
388 4GII (red color). The *S. maltophilia sensu lato* clade is shaded in light blue. (B) Pairwise  
389 average nucleotide identity (ANI) calculated with 627 *Stenotrophomonas* genomes.  
390 Colors depict the degree of genome identity. (C) Correlation between ANI and Mash  
391 methods. (D) Density plot of pairwise ANI within the Sm3 genogroup.

392

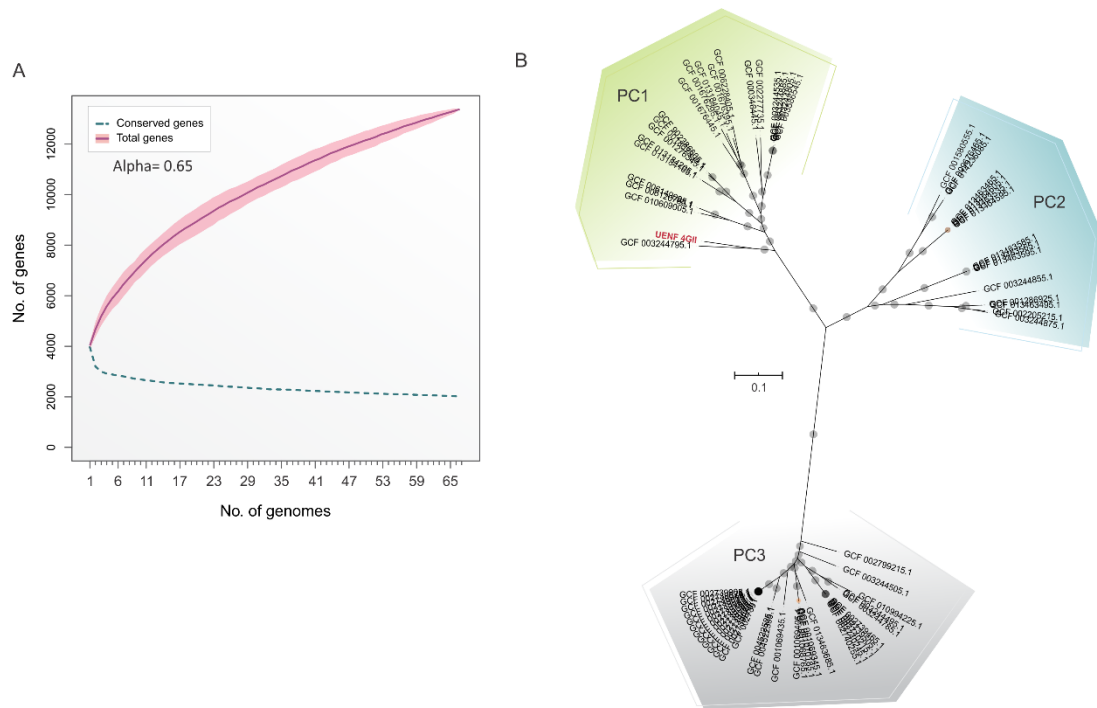

393

394 **Figure 2. Pangenome and phylogeny of Sm3 genogroup.** (A) Number of gene families in  
395 the Sm3 pangenome. The cumulative curve (in dark-red) and alpha value of the Heap  
396 law less than one (0.65) supports an open pangenome. (B) cgMLST of Sm3 genogroup  
397 showing three phylogenetic groups. SNPs extracted from the core genome were used to  
398 build a maximum likelihood phylogenetic tree using IQ-tree (see methods for details).  
399 Bootstrap values below and above 70% are represented by orange and gray points,  
400 respectively.



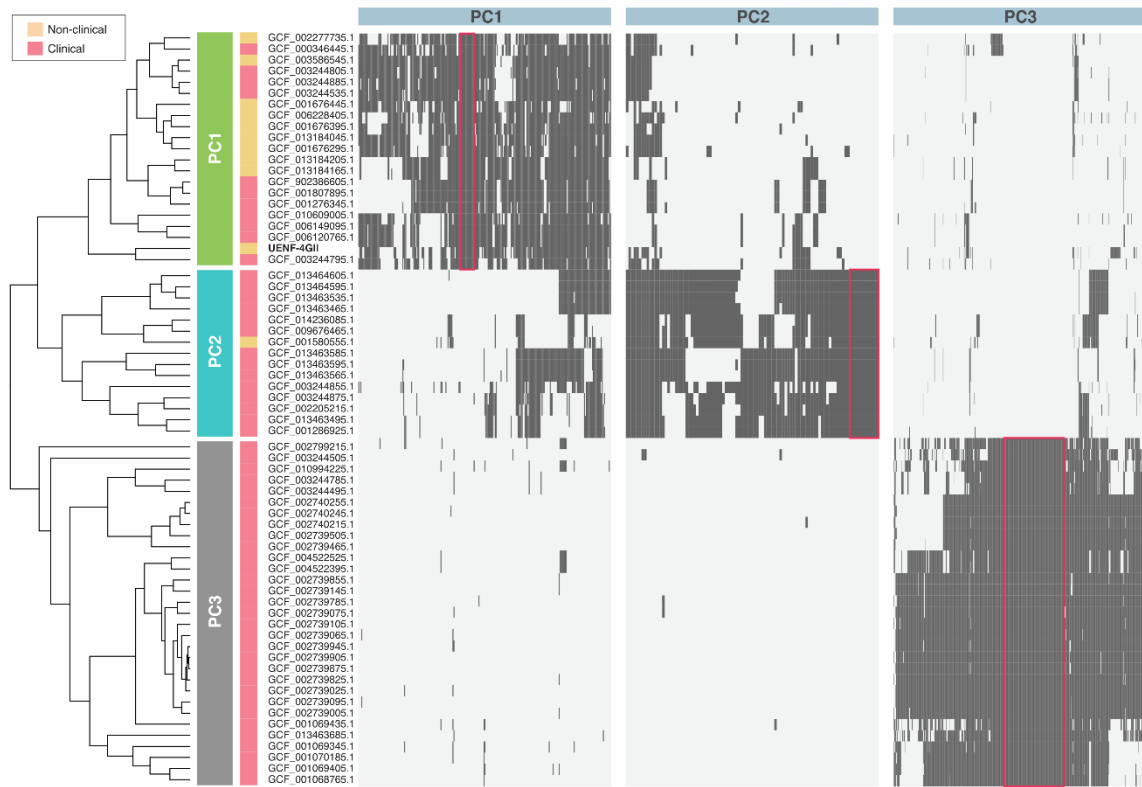

408

409 **Figure 4. Distribution of PC-associated genes in *S. maltophilia* Sm3 genogroup.** The  
410 cgMLST tree is annotated with two strips representing the phylogenetic cluster (PC) and  
411 the environment source. The heatmaps represent the presence (dark-gray) or absence  
412 (light-gray) of the genes identified by the pan-GWAS pipeline using phylogenetic cluster  
413 (PC) as trait. The neon red square highlights the most strongly associated genes found  
414 for each trait (i.e. 100% specificity and sensitivity).

415

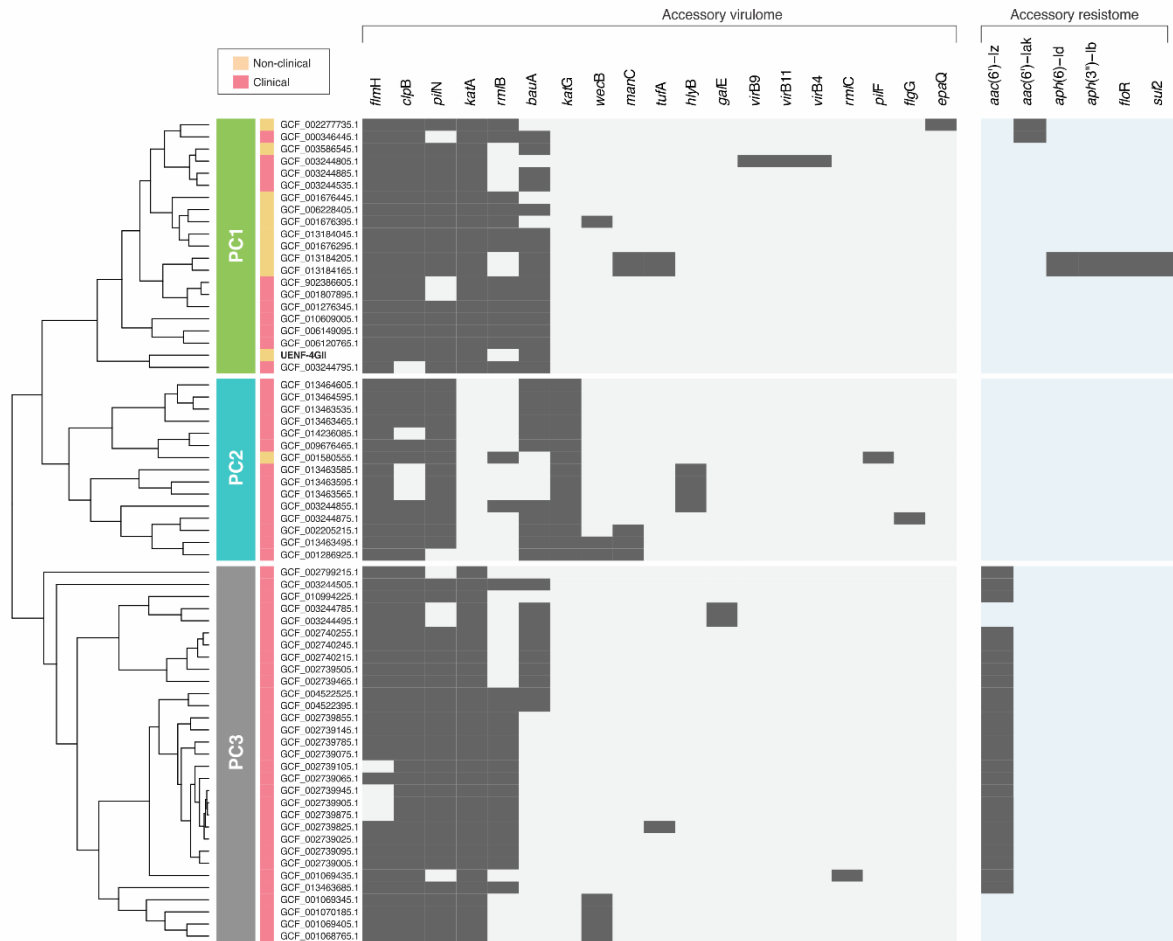

416  
417

418 **Figure 5. Acquired virulome and resistome of *S. maltophilia* Sm3 genogroup.** The  
419 cgMLST tree is annotated with two strips representing the phylogenetic cluster (PC)  
420 identified and the environment source. The binary heatmaps represent the presence  
421 (dark-gray) or absence (light-gray/light-blue) of the genes identified.

422

## 423 REFERENCES

- 424 1. Lim SL, Lee LH, Wu TY: **Sustainability of using composting and vermicomposting**  
425 **technologies for organic solid waste biotransformation: recent overview, greenhouse**  
426 **gases emissions and economic analysis.** *Journal of Cleaner Production* 2016, **111**:262-  
427 278.
- 428 2. Domínguez J, Aira M, Kolbe AR, Gómez-Brandón M, Pérez-Losada M: **Changes in the**  
429 **composition and function of bacterial communities during vermicomposting may**  
430 **explain beneficial properties of vermicompost.** *Scientific reports* 2019, **9**(1):1-11.
- 431 3. Pathma J, Sakthivel N: **Microbial diversity of vermicompost bacteria that exhibit**  
432 **useful agricultural traits and waste management potential.** *SpringerPlus* 2012,  
433 **1**(1):26.
- 434 4. Pathma J, Sakthivel N: **Molecular and functional characterization of bacteria isolated**  
435 **from straw and goat manure based vermicompost.** *Applied soil ecology* 2013, **70**:33-  
436 47.

- 437 5. Matteoli FP, Passarelli-Araujo H, Reis RJA, da Rocha LO, de Souza EM, Aravind L,  
438 Olivares FL, Venancio TM: **Genome sequencing and assessment of plant growth-**  
439 **promoting properties of a *Serratia marcescens* strain isolated from vermicompost.**  
440 *BMC Genomics* 2018, **19**(n. 1):750.
- 441 6. Ryan RP, Monchy S, Cardinale M, Taghavi S, Crossman L, Avison MB, Berg G, Van Der  
442 Lelie D, Dow JM: **The versatility and adaptation of bacteria from the genus**  
443 ***Stenotrophomonas*.** *Nature Reviews Microbiology* 2009, **7**(7):514-525.
- 444 7. Brooke JS: ***Stenotrophomonas maltophilia*: an emerging global opportunistic**  
445 **pathogen.** *Clinical microbiology reviews* 2012, **25**(1):2-41.
- 446 8. Mukherjee P, Roy P: **Genomic potential of *Stenotrophomonas maltophilia* in**  
447 **bioremediation with an assessment of its multifaceted role in our environment.**  
448 *Frontiers in Microbiology* 2016, **7**:967.
- 449 9. Falagas ME, Kastoris AC, Vouloumanou EK, Rafailidis PI, Kapaskelis AM, Dimopoulos G:  
450 **Attributable mortality of *Stenotrophomonas maltophilia* infections: a systematic**  
451 **review of the literature.** *Future microbiology* 2009, **4**(9):1103-1109.
- 452 10. Zemanick ET, Wagner BD, Robertson CE, Ahrens RC, Chmiel JF, Clancy JP, Gibson RL,  
453 Harris WT, Kurland G, Laguna TA: **Airway microbiota across age and disease spectrum**  
454 **in cystic fibrosis.** *European Respiratory Journal* 2017, **50**(5).
- 455 11. Gherardi G, Creti R, Pompilio A, Di Bonaventura G: **An overview of various typing**  
456 **methods for clinical epidemiology of the emerging pathogen *Stenotrophomonas***  
457 ***maltophilia*.** *Diagnostic microbiology and infectious disease* 2015, **81**(3):219-226.
- 458 12. Rhee J-Y, Choi JY, Choi M-J, Song J-H, Peck KR, Ko KS: **Distinct groups and antimicrobial**  
459 **resistance of clinical *Stenotrophomonas maltophilia* complex isolates from Korea.**  
460 *Journal of medical microbiology* 2013, **62**(5):748-753.
- 461 13. Hauben L, Vauterin L, Moore E, Hoste B, Swings J: **Genomic diversity of the genus**  
462 ***Stenotrophomonas*.** *International Journal of Systematic and Evolutionary Microbiology*  
463 1999, **49**(4):1749-1760.
- 464 14. Svensson-Stadler LA, Mihaylova SA, Moore ER: ***Stenotrophomonas interspecies***  
465 **differentiation and identification by *gyrB* sequence analysis.** *FEMS microbiology*  
466 *letters* 2012, **327**(1):15-24.
- 467 15. Ochoa-Sánchez LE, Vinuesa P: **Evolutionary genetic analysis uncovers multiple species**  
468 **with distinct habitat preferences and antibiotic resistance phenotypes in the**  
469 ***Stenotrophomonas maltophilia* complex.** *Frontiers in microbiology* 2017, **8**:1548.
- 470 16. Patil PP, Kumar S, Midha S, Gautam V, Patil PB: **Taxonogenomics reveal multiple novel**  
471 **genomespecies associated with clinical isolates of *Stenotrophomonas maltophilia*.**  
472 *Microbial genomics* 2018, **4**(8).
- 473 17. Steinmann J, Mamat U, Abda EM, Kirchhoff L, Streit WR, Schaible UE, Niemann S, Kohl  
474 TA: **Analysis of phylogenetic variation of *Stenotrophomonas maltophilia* reveals**  
475 **human-specific branches.** *Frontiers in microbiology* 2018, **9**:806.
- 476 18. Gröschel MI, Meehan CJ, Barilar I, Diricks M, Gonzaga A, Steglich M, Conchillo-Solé O,  
477 Scherer I-C, Mamat U, Luz CF: **The phylogenetic landscape and nosocomial spread of**  
478 **the multidrug-resistant opportunist *Stenotrophomonas maltophilia*.** *Nature*  
479 *Communications* 2020, **11**(1):1-12.
- 480 19. Bankevich A, Nurk S, Antipov D, Gurevich AA, Dvorkin M, Kulikov AS, Lesin VM,  
481 Nikolenko SI, Pham S, Prjibelski AD *et al*: **SPAdes: a new genome assembly algorithm**  
482 **and its applications to single-cell sequencing.** *Journal of computational biology : a*  
483 *journal of computational molecular cell biology* 2012, **19**(5):455-477.
- 484 20. Guizelini D, Raittz RT, Cruz LM, Souza EM, Steffens MB, Pedrosa FO: **GFinisher: a new**  
485 **strategy to refine and finish bacterial genome assemblies.** *Scientific reports* 2016,  
486 **6**:34963.
- 487 21. Zerbino R, Birney E: **Velvet: algorithms for de novo short read assembly using de**  
488 **Brujin graphs,** vol. 18; 2008.



- 489 22. Gurevich A, Saveliev V, Vyahhi N, Tesler G: **QUAST: quality assessment tool for**  
490 **genome assemblies.** *Bioinformatics* 2013, **29**(8):1072-1075.
- 491 23. Simão FA, Waterhouse RM, Ioannidis P, Kriventseva EV, Zdobnov EM: **BUSCO:**  
492 **assessing genome assembly and annotation completeness with single-copy**  
493 **orthologs.** *Bioinformatics* 2015, **31**(19):3210-3212.
- 494 24. Antipov D, Hartwick N, Shen M, Raiko M, Lapidus A, Pevzner PA: **plasmidSPAdes:**  
495 **assembling plasmids from whole genome sequencing data.** *Bioinformatics* 2016,  
496 **32**(22):3380-3387.
- 497 25. Tatusova T, DiCuccio M, Badretdin A, Chetvernin V, Nawrocki EP, Zaslavsky L,  
498 Lomsadze A, Pruitt KD, Borodovsky M, Ostell J: **NCBI prokaryotic genome annotation**  
499 **pipeline.** *Nucleic acids research* 2016, **44**(14):6614-6624.
- 500 26. Medema MH, Blin K, Cimermancic P, de Jager V, Zakrzewski P, Fischbach MA, Weber T,  
501 Takano E, Breitling R: **antiSMASH: rapid identification, annotation and analysis of**  
502 **secondary metabolite biosynthesis gene clusters in bacterial and fungal genome**  
503 **sequences.** *Nucleic acids research* 2011, **39**(suppl\_2):W339-W346.
- 504 27. Xie Z, Tang H: **ISEScan: automated identification of insertion sequence elements in**  
505 **prokaryotic genomes.** *Bioinformatics* 2017, **33**(21):3340-3347.
- 506 28. Bertelli C, Laird MR, Williams KP, Group SFURC, Lau BY, Hoad G, Winsor GL, Brinkman  
507 FS: **IslandViewer 4: expanded prediction of genomic islands for larger-scale datasets.**  
508 *Nucleic acids research* 2017, **45**(W1):W30-W35.
- 509 29. Arndt D, Grant JR, Marcu A, Sajed T, Pon A, Liang Y, Wishart DS: **PHASTER: a better,**  
510 **faster version of the PHAST phage search tool.** *Nucleic acids research* 2016,  
511 **44**(W1):W16-W21.
- 512 30. O'Leary NA, Wright MW, Brister JR, Ciuffo S, Haddad D, McVeigh R, Rajput B, Robbertse  
513 B, Smith-White B, Ako-Adjei D *et al*: **Reference sequence (RefSeq) database at NCBI:**  
514 **current status, taxonomic expansion, and functional annotation.** *Nucleic Acids Res*  
515 2016, **44**(D1):D733-745.
- 516 31. Pruitt KD, Tatusova T, Maglott DR: **NCBI reference sequences (RefSeq): a curated non-**  
517 **redundant sequence database of genomes, transcripts and proteins.** *Nucleic Acids*  
518 *Res* 2007, **35**(Database issue):D61-65.
- 519 32. Ondov BD, Treangen TJ, Melsted P, Mallonee AB, Bergman NH, Koren S, Phillippy AM:  
520 **Mash: fast genome and metagenome distance estimation using MinHash.** *Genome*  
521 *Biology* 2016, **17**(n. 1):132.
- 522 33. Katz L, Griswold T, Carleton H: **Generating WGS Trees with Mashtree.** In: *Poster*  
523 *presented at: American Society for Microbiology Conference on Rapid Applied*  
524 *Microbial Next-Generation Sequencing and Bioinformatic Pipelines: 2017*; 2017: 8-11.
- 525 34. Pritchard L, Glover RH, Humphris S, Elphinstone JG, Toth IK: **Genomics and taxonomy**  
526 **in diagnostics for food security: soft-rotting enterobacterial plant pathogens.**  
527 *Analytical Methods* 2016, **8**(1):12-24.
- 528 35. Page AJ, Cummins CA, Hunt M, Wong VK, Reuter S, Holden MT, Fookes M, Falush D,  
529 Keane JA, Parkhill J: **Roary: rapid large-scale prokaryote pan genome analysis.**  
530 *Bioinformatics* 2015, **31**(22):3691-3693.
- 531 36. Katoh K, Standley DM: **MAFFT multiple sequence alignment software version 7:**  
532 **improvements in performance and usability.** *Molecular biology and evolution* 2013,  
533 **30**(4):772-780.
- 534 37. Page AJ, Taylor B, Delaney AJ, Soares J, Seemann T, Keane JA, Harris SR: **SNP-sites:**  
535 **rapid efficient extraction of SNPs from multi-FASTA alignments.** *Microbial Genomics*  
536 2016, **2**(4).
- 537 38. Nguyen L-T, Schmidt HA, von Haeseler A, Minh BQ: **IQ-TREE: a fast and effective**  
538 **stochastic algorithm for estimating maximum-likelihood phylogenies.** *Molecular*  
539 *biology and evolution* 2014, **32**(1):268-274.

- 540 39. Minh BQ, Nguyen MAT, von Haeseler A: **Ultrafast approximation for phylogenetic**  
541 **bootstrap**. *Molecular biology and evolution* 2013, **30**(5):1188-1195.
- 542 40. Letunic I, Bork P: **Interactive Tree Of Life (iTOL) v4: recent updates and new**  
543 **developments**. *Nucleic acids research* 2019.
- 544 41. Wickham H, Averick M, Bryan J, Chang W, McGowan LDA, François R, Golemund G,  
545 Hayes A, Henry L, Hester J: **Welcome to the Tidyverse**. *Journal of Open Source*  
546 *Software* 2019, **4**(43):1686.
- 547 42. Yuzenkova J, Nechaev S, Berlin J, Rogulja D, Kuznedelov K, Inman R, Mushegian A,  
548 Severinov K: **Genome of Xanthomonas oryzae bacteriophage Xp10: an odd T-odd**  
549 **phage**. *Journal of molecular biology* 2003, **330**(4):735-748.
- 550 43. Goel AK, Rajagopal L, Nagesh N, Sonti RV: **Genetic locus encoding functions involved**  
551 **in biosynthesis and outer membrane localization of xanthomonadin in Xanthomonas**  
552 **oryzae pv. oryzae**. *Journal of bacteriology* 2002, **184**(13):3539-3548.
- 553 44. Kalidasan V, Joseph N, Kumar S, Awang Hamat R, Neela VK: **Iron and virulence in**  
554 **Stenotrophomonas maltophilia: all we know so far**. *Frontiers in cellular and infection*  
555 *microbiology* 2018, **8**:401.
- 556 45. Nas MY, Cianciotto NP: **Stenotrophomonas maltophilia produces an EntC-dependent**  
557 **catecholate siderophore that is distinct from enterobactin**. *Microbiology* 2017,  
558 **163**(11):1590.
- 559 46. Tettelin H, Medini D: **The pangenome: Diversity, dynamics and evolution of genomes**.  
560 2020.
- 561 47. Ealand CS, Machowski EE, Kana BD:  **$\beta$ -lactam resistance: The role of low molecular**  
562 **weight penicillin binding proteins,  $\beta$ -lactamases and Id-transpeptidases in bacteria**  
563 **associated with respiratory tract infections**. *IUBMB life* 2018, **70**(9):855-868.
- 564 48. Sarkar SK, Chowdhury C, Ghosh AS: **Deletion of penicillin-binding protein 5 (PBP5)**  
565 **sensitises Escherichia coli cells to  $\beta$ -lactam agents**. *International journal of*  
566 *antimicrobial agents* 2010, **35**(3):244-249.
- 567 49. Huang Y-W, Wang Y, Lin Y, Lin C, Lin Y-T, Hsu C-C, Yang T-C: **Impacts of penicillin**  
568 **binding protein 2 inactivation on  $\beta$ -lactamase expression and muropeptide profile in**  
569 **Stenotrophomonas maltophilia**. *Msystems* 2017, **2**(4).
- 570 50. Dimitriu T, Szczelkun MD, Westra ER: **Evolutionary Ecology and Interplay of**  
571 **Prokaryotic Innate and Adaptive Immune Systems**. *Current Biology* 2020,  
572 **30**(19):R1189-R1202.
- 573 51. Zheng Y, Cohen-Karni D, Xu D, Chin HG, Wilson G, Pradhan S, Roberts RJ: **A unique**  
574 **family of Mrr-like modification-dependent restriction endonucleases**. *Nucleic acids*  
575 *research* 2010, **38**(16):5527-5534.
- 576 52. Tock MR, Dryden DT: **The biology of restriction and anti-restriction**. *Current opinion in*  
577 *microbiology* 2005, **8**(4):466-472.
- 578 53. David SS, O'Shea VL, Kundu S: **Base-excision repair of oxidative DNA damage**. *Nature*  
579 2007, **447**(7147):941-950.
- 580 54. Hutinet G, Swarjo MA, de Crécy-Lagard V: **Deazaguanine derivatives, examples of**  
581 **crosstalk between RNA and DNA modification pathways**. *RNA biology* 2017,  
582 **14**(9):1175-1184.
- 583 55. Thiaville JJ, Kellner SM, Yuan Y, Hutinet G, Thiaville PC, Jumpathong W, Mohapatra S,  
584 Brochier-Armanet C, Letarov AV, Hillebrand R: **Novel genomic island modifies DNA**  
585 **with 7-deazaguanine derivatives**. *Proceedings of the National Academy of Sciences*  
586 2016, **113**(11):E1452-E1459.
- 587 56. Smedley JG, Jewell E, Roguskie J, Horzempa J, Syboldt A, Stolz DB, Castric P: **Influence**  
588 **of pilin glycosylation on Pseudomonas aeruginosa 1244 pilus function**. *Infection and*  
589 *immunity* 2005, **73**(12):7922-7931.

- 590 57. Harvey H, Bondy-Denomy J, Marquis H, Sztanko KM, Davidson AR, Burrows LL:  
591 **Pseudomonas aeruginosa defends against phages through type IV pilus**  
592 **glycosylation.** *Nature microbiology* 2018, **3**(1):47-52.
- 593 58. Vanaporn M, Titball RW: **Trehalose and bacterial virulence.** *Virulence* 2020,  
594 **11**(1):1192-1202.
- 595 59. Collins J, Robinson C, Danhof H, Knetsch C, Van Leeuwen H, Lawley T, Auchtung J,  
596 Britton R: **Dietary trehalose enhances virulence of epidemic *Clostridium difficile*.**  
597 *Nature* 2018, **553**(7688):291-294.
- 598 60. Schwarz S, Van Dijck P: **Trehalose metabolism: a sweet spot for *Burkholderia***  
599 ***pseudomallei* virulence.** *Virulence* 2017, **8**(1):5-7.
- 600 61. Mercier-Darty M, Royer G, Lamy B, Charron C, Lemenand O, Gomart C, Fourreau F,  
601 Madec J-Y, Jumas-Bilak E, Decousser J-W: **Comparative Whole-Genome Phylogeny of**  
602 **Animal, Environmental, and Human Strains Confirms the Genogroup Organization**  
603 **and Diversity of the *Stenotrophomonas maltophilia* Complex.** *Applied and*  
604 *Environmental Microbiology* 2020, **86**(10).
- 605 62. Okazaki A, Avison MB: **Induction of L1 and L2  $\beta$ -lactamase production in**  
606 ***Stenotrophomonas maltophilia* is dependent on an AmpR-type regulator.**  
607 *Antimicrobial agents and chemotherapy* 2008, **52**(4):1525.
- 608 63. Mojica MF, Rutter JD, Taracila M, Abriata LA, Fouts DE, Papp-Wallace KM, Walsh TJ,  
609 LiPuma JJ, Vila AJ, Bonomo RA: **Population structure, molecular epidemiology, and  $\beta$ -**  
610 **lactamase diversity among *Stenotrophomonas maltophilia* isolates in the United**  
611 **States.** *MBio* 2019, **10**(4).
- 612 64. Han L, Zhang R-M, Jia L, Bai S-C, Liu X-W, Wei R, Cui C-Y, Sun R-Y, Wang M-G, Cai D-T:  
613 **Diversity of L1/L2 genes and molecular epidemiology of high-level carbapenem**  
614 **resistance *Stenotrophomonas maltophilia* isolates from animal production**  
615 **environment in China.** *Infection, Genetics and Evolution* 2020, **86**:104531.
- 616 65. Barth E, Gora KV, Gebendorfer KM, Settele F, Jakob U, Winter J: **Interplay of cellular**  
617 **cAMP levels,  $\sigma$ S activity and oxidative stress resistance in *Escherichia coli*.**  
618 *Microbiology* 2009, **155**(Pt 5):1680.
- 619 66. Norton JP, Mulvey MA: **Toxin-antitoxin systems are important for niche-specific**  
620 **colonization and stress resistance of uropathogenic *Escherichia coli*.** *PLoS Pathog*  
621 2012, **8**(10):e1002954.
- 622 67. Miethke M, Klotz O, Linne U, May JJ, Beckering CL, Marahiel MA: **Ferri-bacillibactin**  
623 **uptake and hydrolysis in *Bacillus subtilis*.** *Molecular microbiology* 2006, **61**(6):1413-  
624 1427.
- 625 68. Chouchane S, Giroto S, Kapetanaki S, Schelvis JP, Yu S, Magliozzo RS: **Analysis of heme**  
626 **structural heterogeneity in *Mycobacterium tuberculosis* catalase-peroxidase (KatG).**  
627 *Journal of Biological Chemistry* 2003, **278**(10):8154-8162.
- 628 69. Kim Y, Maltseva N, Wilamowski M, Tesar C, Endres M, Joachimiak A: **Structural and**  
629 **biochemical analysis of the metallo- $\beta$ -lactamase L1 from emerging pathogen**  
630 ***Stenotrophomonas maltophilia* revealed the subtle but distinct di-metal scaffold for**  
631 **catalytic activity.** *Protein Science* 2020, **29**(3):723-743.
- 632 70. Comolli JC, Hauser AR, Waite L, Whitchurch CB, Mattick JS, Engel JN: ***Pseudomonas***  
633 ***aeruginosa* gene products PilT and PilU are required for cytotoxicity in vitro and**  
634 **virulence in a mouse model of acute pneumonia.** *Infection and immunity* 1999,  
635 **67**(7):3625-3630.
- 636 71. Harvey KL, Jarocki VM, Charles IG, Djordjevic SP: **The diverse functional roles of**  
637 **elongation factor Tu (EF-Tu) in microbial pathogenesis.** *Frontiers in microbiology*  
638 2019, **10**:2351.
- 639 72. Pan H, Luan J, He X, Lux R, Shi W: **The *clpB* gene is involved in the stress response of**  
640 ***Myxococcus xanthus* during vegetative growth and development.** *Microbiology* 2012,  
641 **158**(Pt 9):2336.

- 642 73. Charoenlap N, Jiramonai L, Chittrakanwong J, Tunsakul N, Mongkolsuk S,  
643 Vattanaviboon P: **Inactivation of ahpC renders *Stenotrophomonas maltophilia***  
644 **resistant to the disinfectant hydrogen peroxide.** *Antonie Van Leeuwenhoek* 2019,  
645 **112(5):809-814.**
- 646 74. Chun H, Choi O, Goo E, Kim N, Kim H, Kang Y, Kim J, Moon JS, Hwang I: **The quorum**  
647 **sensing-dependent gene katG of *Burkholderia glumae* is important for protection**  
648 **from visible light.** *Journal of bacteriology* 2009, **191(13):4152-4157.**
- 649 75. Li L-H, Shih Y-L, Huang J-Y, Wu C-J, Huang Y-W, Huang H-H, Tsai Y-C, Yang T-C:  
650 **Protection from hydrogen peroxide stress relies mainly on AhpCF and KatA2 in**  
651 ***Stenotrophomonas maltophilia*.** *Journal of biomedical science* 2020, **27(1):1-9.**
- 652 76. Sánchez MB: **Antibiotic resistance in the opportunistic pathogen *Stenotrophomonas***  
653 ***maltophilia*.** *Frontiers in microbiology* 2015, **6:658.**

654
